# Supplementary material
Source: Springer Nature journal article supplement (https://www.springermedizin.de/resource/supplementary/12884_2012_702_MOESM5_ESM.pdf/9458512)
Supplement: MOESM5 [file 9458512]

**Table 2. Experience of childbirth in relation to expectations in primiparous women of advanced age (≥32 years) compared with the reference group (25-31 years).**

**All women and subgroups of women by mode of delivery\*\***

Total sample = 30 065 women. Regression analyses presented as Crude and Adjusted Odds Ratio (OR) with 95 % Confidence Intervals (CI).

| Maternal age, yrs                               | Total  | As expected/mixed feelings |      | Worse than expected |      |          |             | Better than expected |             |      |      |          |             |         |             |
|-------------------------------------------------|--------|----------------------------|------|---------------------|------|----------|-------------|----------------------|-------------|------|------|----------|-------------|---------|-------------|
|                                                 |        | n                          | %    | n                   | %    | Crude OR | 95% CI      | Adj OR*              | 95% CI      | n    | %    | Crude OR | 95% CI      | Adj OR* | 95% CI      |
| <b>All women</b>                                |        |                            |      |                     |      |          |             |                      |             |      |      |          |             |         |             |
| 25-31                                           | 21 226 | 11 349                     | 53.5 | 5376                | 25.3 | 1        |             | 1                    |             | 4501 | 21.2 | 1        |             | 1       |             |
| ≥32                                             | 8839   | 4652                       | 52.6 | 2411                | 27.2 | 1.09     | (1.03-1.16) | 1.09                 | (1.02-1.16) | 1776 | 20.1 | 0.96     | (0.90-1.03) | 0.97    | (0.90-1.03) |
| <b>Subgroups of women by mode of delivery</b>   |        |                            |      |                     |      |          |             |                      |             |      |      |          |             |         |             |
| <i>Women with a spontaneous vaginal birth</i>   |        |                            |      |                     |      |          |             |                      |             |      |      |          |             |         |             |
| 25-31                                           | 14 583 | 8268                       | 56.7 | 2342                | 16.1 | 1        |             | 1                    |             | 3973 | 27.2 | 1        |             | 1       |             |
| ≥32                                             | 5192   | 2872                       | 55.3 | 913                 | 17.6 | 1.12     | (1.03-1.23) | 1.12                 | (1.02-1.22) | 1407 | 27.1 | 1.02     | (0.95-1.10) | 1.02    | (0.95-1.10) |
| <i>Women with instrumental vaginal delivery</i> |        |                            |      |                     |      |          |             |                      |             |      |      |          |             |         |             |
| 25-31                                           | 3583   | 1668                       | 46.6 | 1632                | 45.5 | 1        |             | 1                    |             | 283  | 7.9  | 1        |             | 1       |             |
| ≥32                                             | 1696   | 825                        | 48.6 | 731                 | 43.1 | 0.91     | (0.80-1.02) | 0.9                  | (0.80-1.02) | 140  | 8.3  | 1.00     | (0.80-1.25) | 1.01    | (0.81-1.26) |
| <i>Women with emergency cesarean delivery</i>   |        |                            |      |                     |      |          |             |                      |             |      |      |          |             |         |             |
| 25-31                                           | 2059   | 812                        | 39.4 | 1 135               | 55.1 | 1        |             | 1                    |             | 112  | 5.4  | 1        |             | 1       |             |
| ≥32                                             | 1193   | 498                        | 41.7 | 603                 | 50.5 | 0.87     | (0.75-1.01) | 0.87                 | (0.74-1.01) | 92   | 7.7  | 1.34     | (1.00-1.80) | 1.36    | (1.01-1.85) |
| <i>Women with elective cesarean delivery</i>    |        |                            |      |                     |      |          |             |                      |             |      |      |          |             |         |             |
| 25-31                                           | 665    | 477                        | 71.7 | 66                  | 9.9  | 1        |             | 1                    |             | 122  | 18.8 | 1        |             | 1       |             |
| ≥32                                             | 532    | 364                        | 68.4 | 44                  | 8.3  | 0.87     | (0.58-1.31) | 0.85                 | (0.56-1.30) | 124  | 23.3 | 1.33     | (1.00-1.77) | 1.38    | (1.03-1.84) |

\*Adjusted for smoking, single status, native language other than Norwegian and education

\*\*Women with unclear mode of delivery or combined (VE and emergency cesarean delivery) excluded (n=562)
